# Supplementary material for: Emergence of polar order and tilt in terephthalate based bent-core liquid crystals
Source: Royal Society of Chemistry journal article supplement (doi:10.1039/c6cp08145b), 2017-01-01
Supplement: c6cp08145b1.pdf [file c6cp08145b1.pdf]

## Electronic Supporting Information

### Emergence of polar order and tilt in terephthalate based bent-core liquid crystals

Nerea Sebastián,<sup>1</sup> Sebastian Belau<sup>1</sup>, Alexey Eremin,<sup>1</sup> Mohamed Alaasar,<sup>2,3</sup> Marko Prehm,<sup>2</sup> Carsten Tschierske<sup>2</sup>

<sup>1</sup> Department of Nonlinear Phenomena, Institute for Experimental Physics  
Otto von Guericke University Magdeburg, Magdeburg (Germany)  
e-mail: alexey.eremin@ovgu.de

<sup>2</sup> Institute of Chemistry, Organic Chemistry  
Martin Luther University Halle-Wittenberg, Kurt-Mothes-Str.2, 06120 Halle/Saale (Germany)  
e-mail: carsten.tschierske@chemie.uni-halle.de

<sup>3</sup> Department of Chemistry, Faculty of Science, Cairo University, Giza, Egypt;  
malaasar@sci.cu.edu.eg

#### 1. Synthesis and analytical data

The structure characterization of the synthesized bent-core compound is based on <sup>1</sup>H-, <sup>13</sup>C-NMR (Varian Unity 500 and Varian Unity 400 spectrometers, in CDCl<sub>3</sub> solutions, with tetramethylsilane as internal standard), MS [AMD 402 (electron impact, 70 eV)]. Microanalyses were performed using a Leco CHNS-932 elemental analyzer.

Materials: 4-Hexyloxyphenol (Aldrich), resorcinol (Aldrich), tert-butyl alcohol (Aldrich), sodium chlorite (Aldrich), sodium dihydrogenphosphate (Aldrich), potassium carbonate (Fluka), potassium hydroxide (Merck), 4-formylbenzoic acid (Aldrich), thionylchloride (Aldrich), 1,3-dicycloxylcarbodiimide (DCC; Merck), 4-(N,N-dimethylamino) pyridine (DMAP) (Aldrich), 2,4-dihydroxybenzaldehyde (Aldrich) and hydroxylamine hydrochloride (Merck). Chloroform (Merck) and dichloromethane (Merck) were dried separately over calcium chloride (Merck) and distilled before use. Other solvents and chemicals were used without further purification.

The synthetic procedures leading to the target bent core compound **1/6** are outlined in Scheme S1. 2,4-Dihydroxybenzonitrile was synthesized according to the procedure described in Ref. S1. 4-[(4-n-Hexyloxyphenoxy)carbonyl] benzoic acid was prepared using a procedure similar to that one reported in Ref. S2.

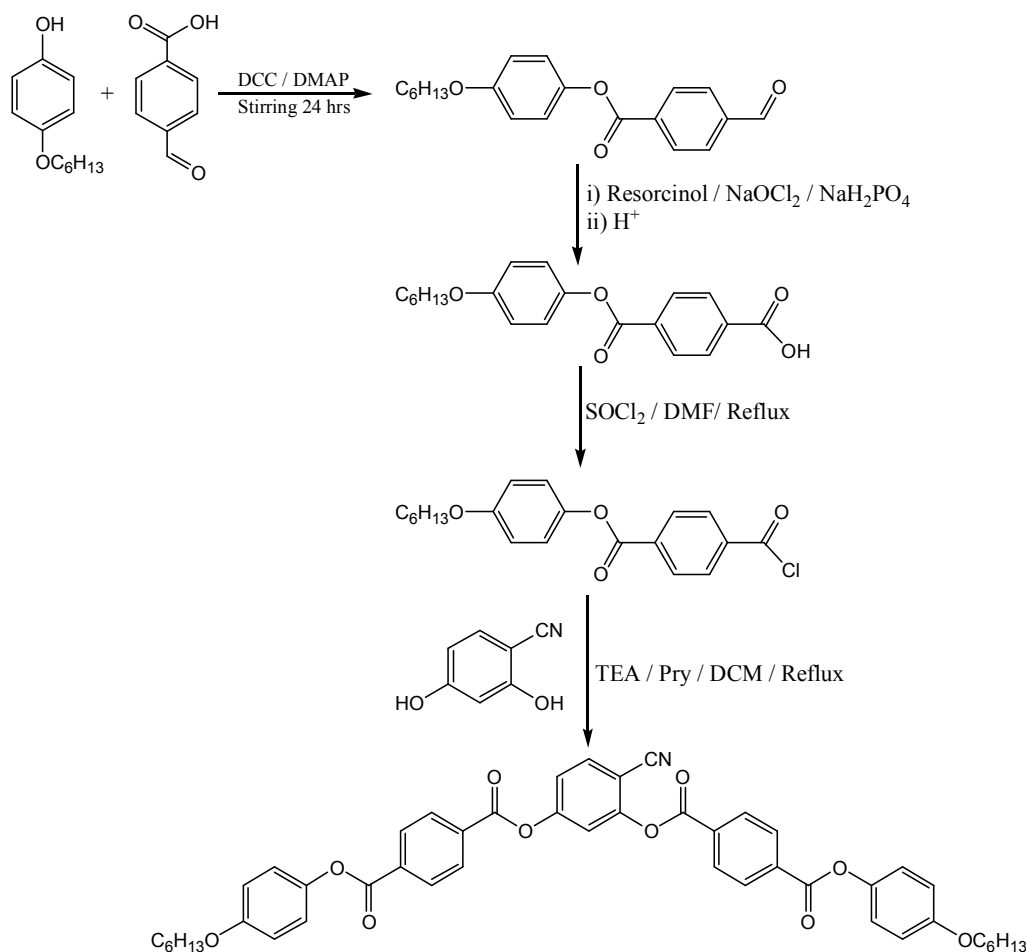

**Scheme S1.** Synthesis of compound 1/6.

**4-[(4-*n*-Hexyloxyphenoxy)carbonyl] benzoic acid.** - Formylbenzoic acid (2.0 g, 13.32 mmol) was acylated with 4-*n*-hexyloxyphenol (2.58 g, 13.32 mmol) in the presence of DCC (2.75 g, 13.32 mmol) to give the intermediate 4-hexyloxyphenyl 4-formylbenzoate (2.7 g, yield 62.1%), which was oxidized to the benzoic acid as following: 4-hexyloxyphenyl 4-formylbenzoate (2.89 g, 8.88 mmol) and resorcinol (1.05 g, 9.50 mmol) were dissolved in tert-butyl alcohol (140 mL). Separately, sodium chlorite (3.80 g, 42.01 mmol) and sodium dihydrogenphosphate (3.04 g, 25.35 mmol) were dissolved in water (30 mL). The aqueous solution was added in a dropwise manner into the tert-butyl alcohol solution over a 10-min period. The pale yellow reaction mixture was then stirred at room temperature overnight. Volatile components were removed under vacuum and the residue was dissolved in water (100 mL). The aqueous solution was acidified to pH 3 by adding 1 N aqueous HCl. The liberated white precipitate was isolated, washed successively with water and hexane, dried in the air and recrystallized from ethanol to give the desired acid as white crystals (2.94 g, yield 97%).

**4-Hexyloxyphenyl 4-formylbenzoate.** - Yield 62.1%, m.p. 95 °C. <sup>1</sup>H-NMR (400 MHz, CDCl<sub>3</sub>): δ 10.14 (s, 1H, Ar-CHO), 8.33 (d, *J* = 8.2 Hz, 2H, Ar-H), 7.99 (d, *J* = 8.2 Hz, 2H, Ar-H), 7.11 (d, 2H, *J* = 9.0 Hz, 2H, Ar-H), 6.92 (d, 2H, *J* = 9.0 Hz, 2H, Ar-H), 3.97 (t, *J* = 8.2 Hz, 2H, Ar-OCH<sub>2</sub>CH<sub>2</sub>), 1.78–1.74 (m, 2H, Ar-OCH<sub>2</sub>CH<sub>2</sub>), 1.52–1.28 (m, 12H, CH<sub>2</sub>), 0.91 (t, *J* = 7.0 Hz, 3H, CH<sub>3</sub>).

**4-(4-*n*-Hexyloxyphenoxy)carbonylbenzoic acid.** - Yield 97%, phase behaviour: Cr 179 °C SmC 237 °C N 246 °C Isotropic liquid. <sup>1</sup>H-NMR (500 MHz, DMSO-*d*<sub>6</sub>) δ 8.21 (d, *J* = 8.2 Hz, 2H, Ar-H), 8.12 (d, *J* = 8.2 Hz, 2H, Ar-H), 7.20 (d, *J* = 8.7 Hz, 2H, Ar-H), 6.99 (d, *J* = 8.7 Hz, 2H, Ar-H), 3.97 (t, *J* = 6.4 Hz, 2H, -OCH<sub>2</sub>), 1.77–1.64 (m, 2H, -OCH<sub>2</sub>CH<sub>2</sub>), 1.48–1.24 (m, 12H, CH<sub>2</sub>), 0.88 (t, *J* = 6.7 Hz, 3H, CH<sub>3</sub>).

**4-Cyano-1,3-phenylene bis[4-(4-*n*-hexyloxyphenoxy)carbonylbenzoate] (1/6).**- 4-(4-*n*-Hexyloxy-phenoxy)carbonylbenzoic acid (0.65 g, 1.89 mmol) was refluxed in excess thionylchloride (SOCl<sub>2</sub>, 2 mL) under argon atmosphere, after one hour the excess thionylchloride was removed under vacuum, then 4-cyanoresorcinol (0.128 g, 0.94 mmol), triethylamine (0.38 g, 2.27 mmol) and pyridine (cat.) were dissolved in anhydrous 15 mL CH<sub>2</sub>Cl<sub>2</sub> and added to the acid chloride and stirring is continued under reflux for 6 hrs. The reaction mixture is then poured into 10 mL of an aqueous solution of 1 N HCl. The organic layer was separated and washed twice with saturated aqueous NaHCO<sub>3</sub> solution. The combined aqueous washes were back-extracted with 30 mL of CH<sub>2</sub>Cl<sub>2</sub>. The organic extracts were dried over anhydrous Na<sub>2</sub>SO<sub>4</sub>, filtered, and concentrated under vacuum. The crude products were purified by column chromatography using CHCl<sub>3</sub> as eluent followed by recrystallization from ethanol/chloroform mixture (1:1) then recrystallization from hexane/toluene (9:1) mixture to give the desired bent-core mesogen as white crystals (0.62 g, yield 84 %).

<sup>1</sup>H-NMR (400 MHz, CDCl<sub>3</sub>): δ 8.43–8.24 (m, 8H, Ar-H), 7.82 (d, *J* = 8.6 Hz, 1H, Ar-H), 7.58 (d, *J* = 2.1 Hz, 1H, Ar-H), 7.36 (dd, *J* = 8.6, 2.1 Hz, 1H, Ar-H), 7.13 (d, *J* = 9.3, 4H, , Ar-H), 6.93 (d, *J* = 9.0, 4H, Ar-H), 3.96 (t, *J* = 6.5 Hz, 4H, -OCH<sub>2</sub>), 1.87–1.70 (m, 4H, -OCH<sub>2</sub>CH<sub>2</sub>), 1.57–1.19 (m, 24H, CH<sub>2</sub>), 0.90 (t, *J* = 6.9 Hz, 6H, CH<sub>3</sub>). <sup>13</sup>C-NMR (100 MHz, CDCl<sub>3</sub>): δ 164.41, 163.14, 162.81, 157.17, 157.14, 154.56, 153.24, 143.98, 143.94, 134.88, 134.75, 134.12, 132.53, 132.14, 130.63, 130.47, 130.41, 122.20, 122.16, 120.14, 117.26, 115.19, 114.54, 114.58, 104.51, 68.47, 31.56, 29.21, 25.70, 22.59, 14.01. Elemental Analysis: Calc. for C<sub>47</sub>H<sub>45</sub>NO<sub>10</sub> C, 72.02; H, 5.79; N, 1.79. Found C, 71.86; H, 5.79; N, 1.79 %.

## 2. Additional data

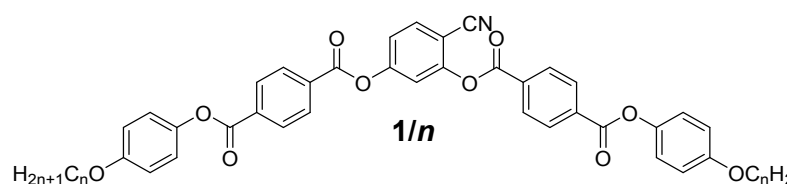

*n* = 6: Cr 103 SmC<sub>a</sub>P<sub>A</sub> 144 SmAP<sub>AR</sub> ~150 SmAP<sub>R</sub> 179 Iso

*n* = 8: Cr 113 SmAP<sub>A</sub> 144 SmA 187 Iso

*n* = 12: Cr 106 SmAP<sub>A</sub> 112 SmA 185 Iso

*n* = 14: Cr 104 SmC'<sub>s</sub>P<sub>A</sub> 111 SmC<sub>s</sub>P<sub>A</sub> 125 SmCP<sub>α</sub> (115 M<sub>1</sub> 133) SmCP<sub>α</sub> 136 SmCP<sub>R</sub> 146 SmA<sub>(P)</sub> ~185 SmA 192 Iso

**Scheme S2.** Phase sequence of compound **1/6** in comparison to the known compounds **1/8**,<sup>S3</sup> **1/12**<sup>S3</sup> and **1/14**<sup>S4</sup> (*T*/°C) as reported in the given references (values on heating, the M<sub>1</sub> phase in brackets is only observed on cooling and replaces the SmCP<sub>α</sub> phase in the specified temperature range).

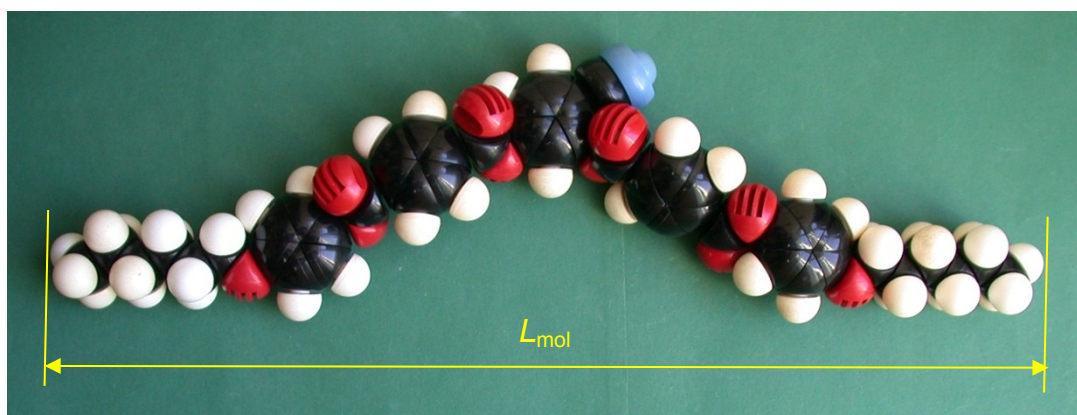

**Figure S1.** CPK model of compound **1/6** in the conformation used for determination of the molecular length.

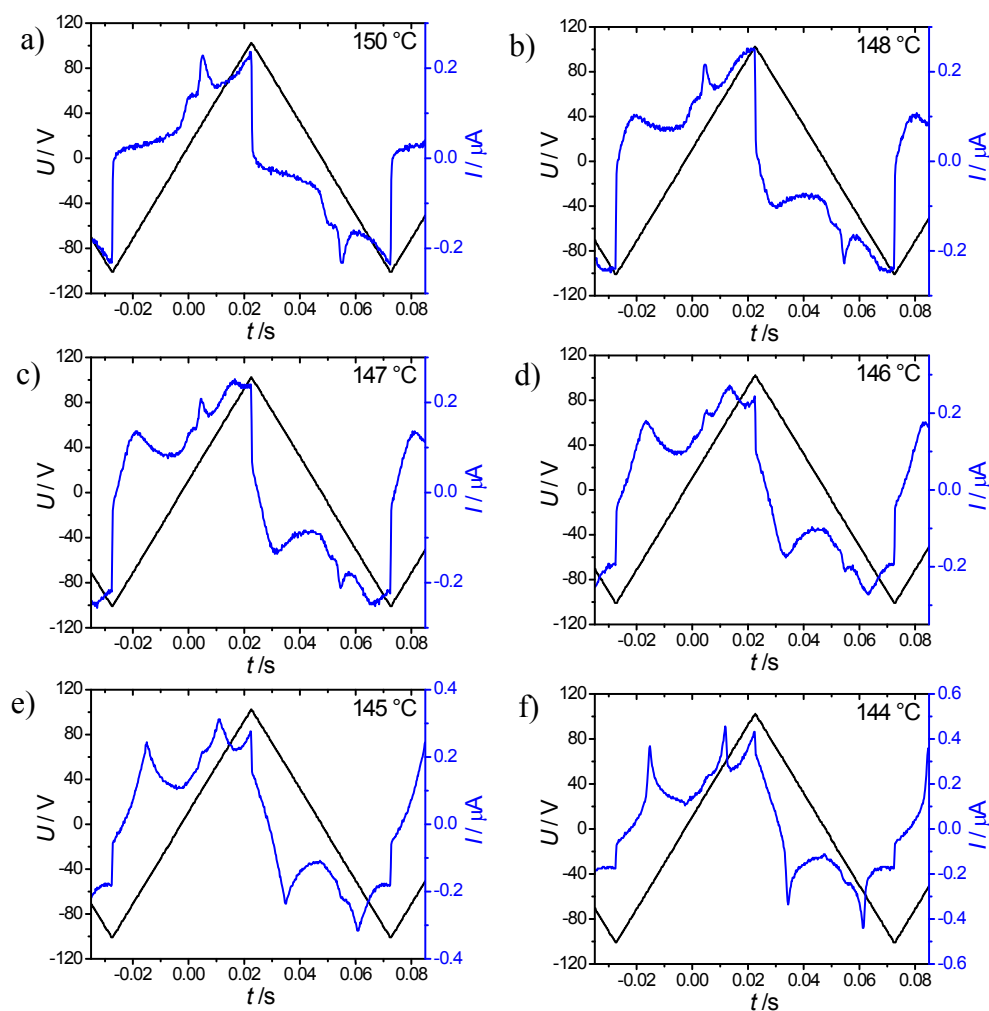

**Figure S2.** Switching current response curves of compound **1/6** recorded by applying a triangular wave voltage (200 V<sub>pp</sub>, 10 Hz, 5 kΩ) to a 6 μm coated ITO cell with planar alignment layer at the indicated temperatures around the SmAP<sub>R</sub>-SmAP<sub>AR</sub>-SmC<sub>a</sub>P<sub>A</sub> phase transitions a) in the SmAP<sub>R</sub> region b,c) at the SmAP<sub>R</sub> – SmAP<sub>AR</sub> transition, d) in the SmAP<sub>AR</sub> region and e, f) upon approaching the SmAP<sub>AR</sub> - SmC<sub>a</sub>P<sub>A</sub> transition.

## References:

- S1. I. Wirth, S. Diele, A. Eremin, G. Pelzl, S. Grande, L. Kovalenko, N. Pancenko and W. Weissflog, *J. Mater. Chem.*, 2001, **11**, 1642.
- S2. M. Alaasar, M. Prehm, M. Poppe, M. Nagaraj, J. K. Vij and C. Tschierske, *Soft Matter*, 2014, **10**, 5003.
- S3 L. Kovalenko , M. W. Schröder , R. A. Reddy , S. Diele , G. Pelzl and W. Weissflog , *Liq. Cryst.*, 2005 , **32**, 857.
- S4 M. Alaasar, M. Prehm, M. Poppe, M. Nagaraj, J. K. Vij and C. Tschierske, *Soft. Matter.*, 2014, **10**, 5003.
